# Supplementary material for: Influenza Vaccination Coverage Rates and Determinants in Greek Children until the Age of Ten (2008–2019), the Rhea Mother–Child Cohort
Source: MDPI journal article supplement (doi:10.3390/vaccines11071241), 2023-07-14
Supplement: s1 [file s1]

## Supplementary material

This supplementary material is hosted by Vaccines as supporting information alongside the article "Influenza vaccination coverage rates and determinants in Greek children until the age of ten (2008-2019); the Rhea mother-child cohort", on behalf of the authors, who remain responsible for the accuracy and appropriateness of the content. The same standards for ethics, copyright, attributions and permissions as for the article apply.

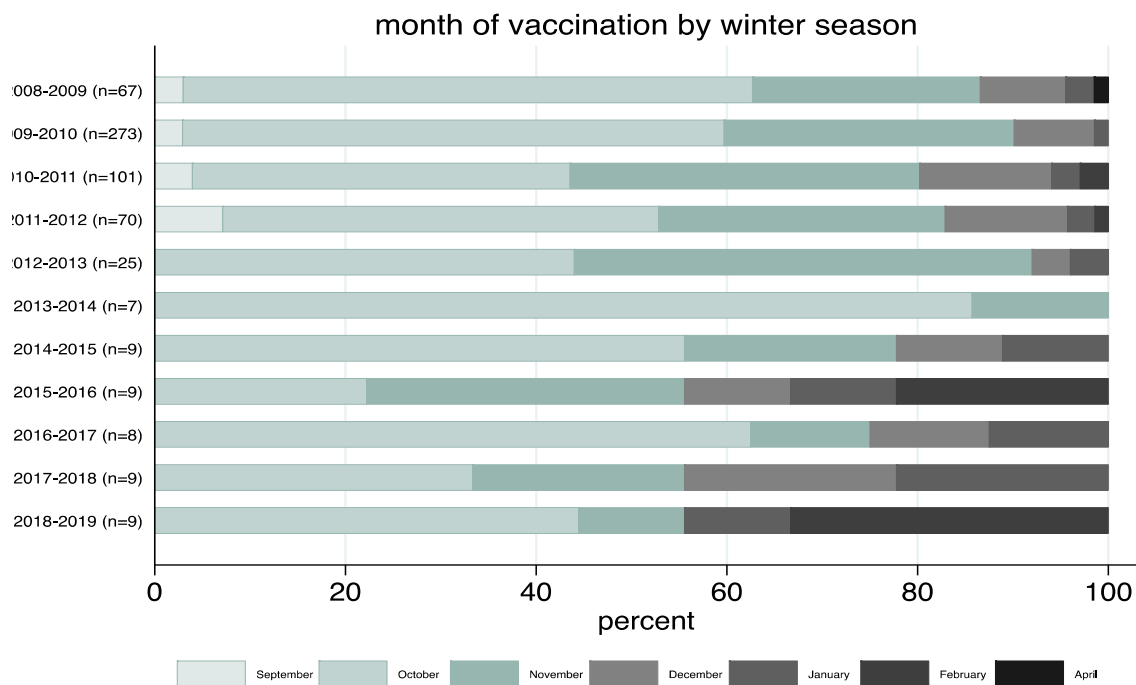

Supplementary Figure S1. Distribution of vaccinations by month of vaccination in each winter season. The season 2019-2020 was excluded from this analysis and graph, because only a few children were evaluated at this season.

| Supplementary table S1. Frequency of trades among all vaccine doses administered |     |      |
|----------------------------------------------------------------------------------|-----|------|
| trade                                                                            | n   | %    |
| vaxigrip                                                                         | 733 | 80.1 |
| fluarix                                                                          | 26  | 2.8  |
| focetria                                                                         | 11  | 1.2  |
| influvac                                                                         | 2   | 0,2  |
| unknown                                                                          | 143 | 15.7 |
| Total                                                                            | 915 | 100  |

Supplementary Table S2. Determinants of ever vaccination by age four based on univariate regression models.

| Characteristics                 | all         | Ever vaccinated until age four |         |              |
|---------------------------------|-------------|--------------------------------|---------|--------------|
|                                 | n (%)       | n (%)                          | OR      | 95% CI       |
| <b>maternal age</b>             |             |                                |         |              |
| 35-45                           | 97 (11,8)   | 30 (9,8)                       | 0.74    | [0.43,1.26]  |
| 25-35                           | 558 (68,1)  | 214 (69,9)                     | 1.02    | [0.71,1.47]  |
| 17-25                           | 164 (20,0)  | 62 (20,3)                      |         | REF          |
| <b>Maternal education</b>       |             |                                |         |              |
| high                            | 261 (32,5)  | 104 (35,0)                     | 1.55    | [0.99,2.44]  |
| medium                          | 414 (51,6)  | 155 (52,2)                     | 1.40    | [0.91,2.15]  |
| low                             | 127 (15,8)  | 38 (12,8)                      |         | REF          |
| <b>Maternal origin</b>          |             |                                |         |              |
| Greek                           | 772 (94,1)  | 288 (95,0)                     | 1.31    | [0.70,2.45]  |
| non-Greek                       | 48 (5,9)    | 15 (5,0)                       |         | REF          |
| <b>Gender</b>                   |             |                                |         |              |
| girl                            | 405 (49,0)  | 147 (47,9)                     | 0.93    | [0.70,1.24]  |
| boy                             | 422 (51,0)  | 160 (52,1)                     |         | REF          |
| <b>preterm birth</b>            |             |                                |         |              |
| yes                             | 95 (11,8)   | 40 (13,6)                      | 1.29    | [0.84,2.00]  |
| no                              | 709 (88,2)  | 255 (86,4)                     |         | REF          |
| <b>delivery type</b>            |             |                                |         |              |
| caesarean                       | 400 (49,5)  | 142 (47,8)                     | 0.90    | [0.67,1.20]  |
| vaginal                         | 408 (50,5)  | 155 (52,2)                     |         | REF          |
| <b>breastfeeding ever</b>       |             |                                |         |              |
| yes                             | 672 (86,5)  | 244 (85,0)                     | 0.82    | [0.54,1.25]  |
| no                              | 105 (13,5)  | 43 (15,0)                      |         | REF          |
| <b>older siblings</b>           |             |                                |         |              |
| yes                             | 445 (55,4)  | 150 (50,8)                     | 0.75*   | [0.56,1.00]  |
| no                              | 358 (44,6)  | 145 (49,2)                     |         | REF          |
| <b>child's health insurance</b> |             |                                |         |              |
| "IKA"                           | 346 (42.2%) | 105 (34.4%)                    | 0.53*** | [0.37, 0.74] |
| "OGA"                           | 136 (16.6%) | 59 (19.3%)                     | 0.93    | [0.61, 1.42] |
| "OPAD/OAEE"                     | 232 (28.3%) | 105 (34.4%)                    |         | REF          |
| other                           | 93 (11.3%)  | 31 (10.2%)                     | 0.60*   | [0.37, 1.00] |
| none                            | 13 (1.6%)   | 5 (1.6%)                       | 0.76    | [0.24, 2.38] |
| <b>passive smoking 4 years</b>  |             |                                |         |              |
| yes                             | 368 (46,2)  | 121 (41,0)                     | 0.72*   | [0.53,0.96]  |
| no                              | 428 (53,8)  | 174 (59,0)                     |         | REF          |
| <b>residency 4 years</b>        |             |                                |         |              |
| urban                           | 588 (71,1)  | 210 (68,4)                     | 0.81    | [0.60,1.11]  |
| rural                           | 239 (28,9)  | 97 (31,6)                      |         | REF          |
| <b>asthma diagnosis 4 years</b> |             |                                |         |              |
| yes                             | 44 (5,4)    | 19 (6,3)                       | 1.30    | [0.71,2.41]  |
| no                              | 771 (94,6)  | 284 (93,7)                     |         | REF          |
| <b>obese 4 years</b>            |             |                                |         |              |

|     |            |            |      |             |
|-----|------------|------------|------|-------------|
| yes | 60 (7,3)   | 23 (7,5)   | 1.06 | [0.62,1.82] |
| no  | 764 (92,7) | 282 (92,5) |      | REF         |

---

Supplementary Table S3. Determinants of ever vaccination by age four based on stepwise regression models among children without asthma and/or obesity (n=501 with complete data)

| Characteristics                               | Univariate |              | Multivariate |              |
|-----------------------------------------------|------------|--------------|--------------|--------------|
|                                               | OR         | 95% CI       | OR           | 95% CI       |
| <b>early daycare attendance</b>               |            |              |              |              |
| yes                                           | 1.46*      | [1.02, 2.09] | 1.51         | [0.97, 2.35] |
| no                                            |            | REF          |              | REF          |
| <b>younger siblings</b>                       |            |              |              |              |
| yes                                           | 1.62**     | [1.18, 2.21] | 1.75**       | [1.19, 2.59] |
| no                                            |            | REF          |              | REF          |
| <b>passive smoking 1 year</b>                 |            |              |              |              |
| yes                                           | 0.70*      | [0.51, 0.97] | 0.70         | [0.48, 1.02] |
| no                                            |            | REF          |              | REF          |
| <b>respiratory infections the first year</b>  |            |              |              |              |
| 2-4 infections                                | 1.75**     | [1.16, 2.64] | 2.08**       | [1.32, 3.29] |
| 0-1 infections                                |            | REF          |              | REF          |
| <b>respiratory infections the fourth year</b> |            |              |              |              |
| 2-4 infections                                | 1.49*      | [1.05, 2.10] | 1.44         | [0.94, 2.21] |
| 0-1 infections                                |            | REF          |              | REF          |
